# Supplementary material
Source: MDPI journal article supplement (https://www.mdpi.com/1424-2818/11/10/189)
Supplement: s1 [file s1]

## Supplementary Material 2

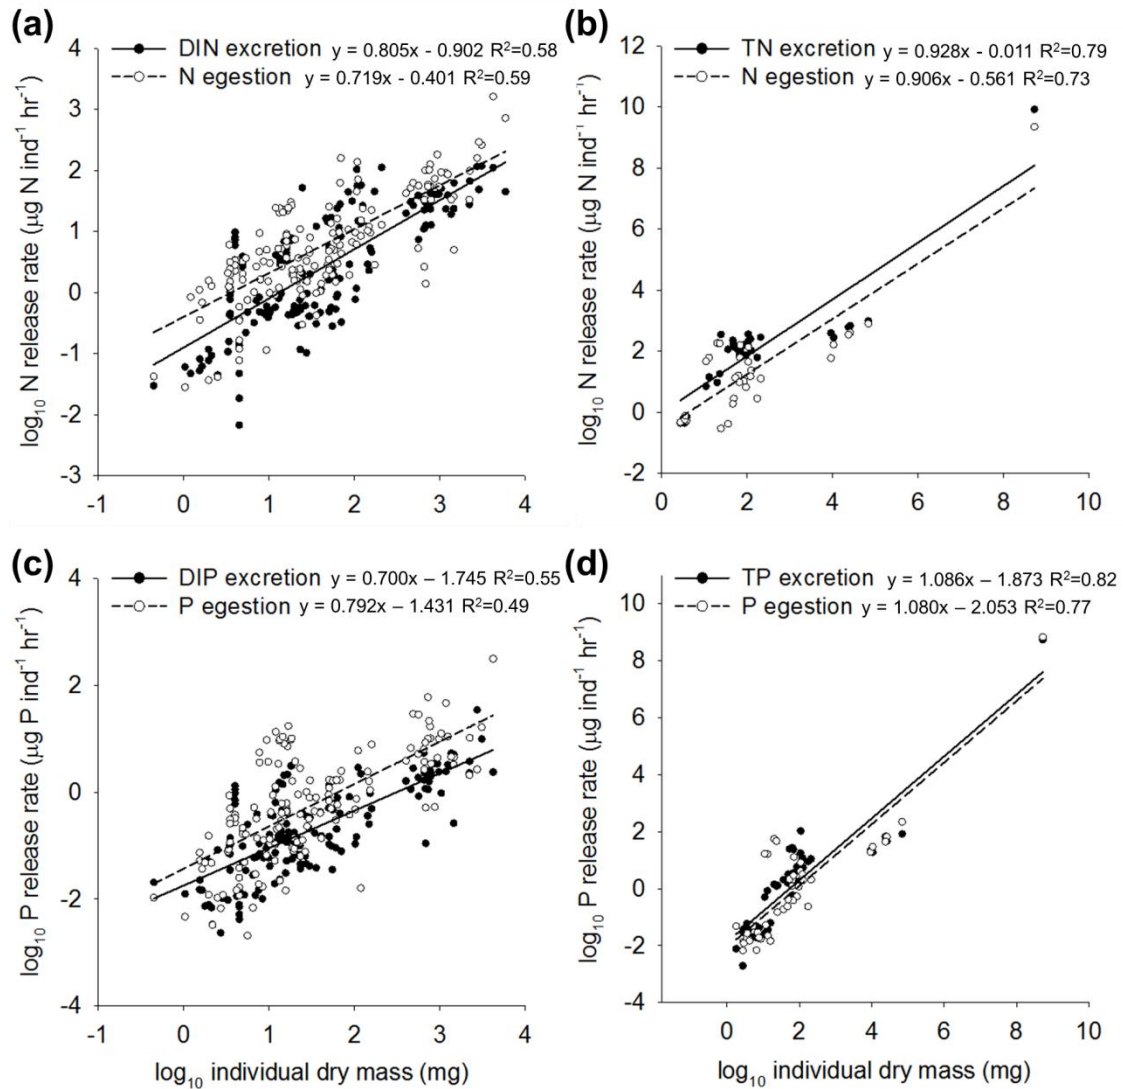

**Figure 1.** Scatterplots of mean log-transformed N and P excretion and egestion rates and individual body dry mass across all study populations included in the meta-analysis. Panels are arranged into (a) N egestion and dissolved inorganic N (DIN) excretion, (b) N egestion and total N (TN) excretion, (c) P egestion and dissolved inorganic P (DIP) excretion, and (d) P egestion and total P (TP) excretion. Equations next to legend identifications describe linear regression statistics for each pathway of nutrient release as a function of body mass. Only populations from which both excretion and egestion were measured are included.

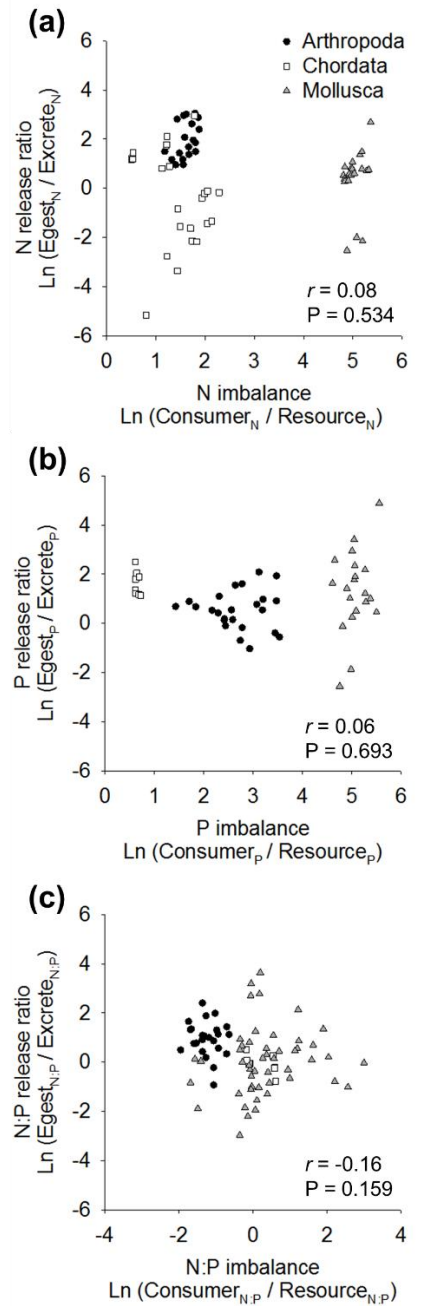

**Figure S2.** Scatterplots of (a) N release ratios, (b) P release ratios, or (c) N:P release ratios of egestion relative to excretion across degrees of consumer-resource elemental imbalance. Pearson's correlation coefficients and  $P$ -values are designated for each dataset (all phyla included) within each panel.

**Table S1.** Summary of best-fit mixed effects model intercepts for all analyses of release ratios.

| Response                      | Model structure                                   | Model intercept | SE    | <i>t</i> -value       | <i>P</i> -value |
|-------------------------------|---------------------------------------------------|-----------------|-------|-----------------------|-----------------|
| N release ratio (inorganic)   | 1 Source Study + 1 Family                         | 0.782           | 0.271 | 2.89 <sub>1,126</sub> | 0.005           |
| N release ratio (total)       | 1 Family                                          | -0.558          | 0.319 | -1.75 <sub>1,27</sub> | 0.092           |
| P release ratio (inorganic)   | Log Dry Mass + Phylum + 1 Source Study + 1 Family | 1.23            | 0.557 | 2.21 <sub>1,122</sub> | 0.029           |
| P release ratio (total)       | 1 Family                                          | 0.343           | 0.431 | 0.80 <sub>1,38</sub>  | 0.430           |
| N:P release ratio (inorganic) | 1 Source Study + 1 Family                         | 0.195           | 0.23  | 0.85 <sub>1,108</sub> | 0.397           |
| N:P release ratio (total)     | 1 Family                                          | -0.542          | 0.45  | -1.21 <sub>1,40</sub> | 0.233           |

**Table S2.** Summary of best-fit mixed effects model intercepts for all analyses of release relative variance.

| Response                                  | Model structure                  | Model intercept | SE    | t-value               | P-value |
|-------------------------------------------|----------------------------------|-----------------|-------|-----------------------|---------|
| N release relative variance (inorganic)   | 1 Family                         | 0.326           | 0.125 | 2.60 <sub>1,137</sub> | 0.010   |
| N release relative variance (total)       | 1 Family                         | 0.368           | 0.326 | 1.13 <sub>1,24</sub>  | 0.270   |
| P release relative variance (inorganic)   | Log Dry Mass + Phylum + 1 Family | 0.417           | 0.229 | 1.82 <sub>1,122</sub> | 0.071   |
| P release relative variance (total)       | 1 Family                         | 0.176           | 0.157 | 1.1 <sub>1,26</sub>   | 0.273   |
| N:P release relative variance (inorganic) | 1 Family                         | -0.189          | 0.210 | -0.9 <sub>1,87</sub>  | 0.372   |
| N:P release relative variance (total)     | 1 Family                         | -0.187          | 0.473 | -0.40 <sub>1,34</sub> | 0.695   |
